# Supplementary material for: A national diagnostic framework for patients with ultra-rare disorders: molecular genetic findings using phenotypic and sequencing data
Source: Research Square preprint supplement (doi:10.21203/rs.3.rs-1416633/v1), 2022-03-15
Supplement: Supplementary file 1 [file 9c7691460dc144b264d3545f.docx]

Axel Schmidt1,+, Magdalena Danyel2,+, Kathrin Grundmann3,+, Theresa Brunet4,+, Hannah Klinkhammer5,6, Tzung-Chien Hsieh5, Hartmut Engels1, Sophia Peters1, Alexej Knaus5, Shahida Moosa7, Luisa Averdunk8, Henrike Sczakiel2, Sarina Schwartzmann2, Jean Tori Pantel2, Denise Horn2, Manuel Holtgrewe2, Felix Boschann2, Annemarie Bösch2, Claudia Weiß9, Natalie Weinhold9, Aude-Annick Suter9, Corinna Stoltenburg9, Julia Neugebauer9, Martin Atta Mensah9, Tillmann Kallinich9, Angela Kaindl9, Susanne Holzhauer9, Christoph Bührer9, Philip Bufler9, Hoa Huu Phuc Nguyen10, Sabine Hoffjan10, Corinna Grasemann11, Tobias Rothoeft11, Folke Brinkmann11, Nora Matar nora.matar@rub.de11, Sugirthan Sivalingam1, Claudia Perne1, Elisabeth Mangold1, Martina Kreiss1, Kirsten Cremer1, Regina Betz1, Tim Bender1, Martin Mücke12, Lorenz Grigull12, Thomas Klockgether13, Spier Isabel1, Heimbach André1, Bender Tim12, Fabian Brand5, Christiane Stieber12, Alexandra Marzena Morawiec12, Pantelis Karakostas14, Valentin Schäfer14, Sarah Bernsen12, Patrick Weydt13, Sergio Castro Gomez13, Ahmad Aziz13, Marcus Grobe-Einsler13, Okka Kimmich13, Xenia Kobeleva13, Demet Önder13, Min Ae Lee-Kirsch15,16, Reinhard Berner15,16, Catharina Schütz15,16, Julia Körholz15,16, Tanita Kretschmer15,16, Nataliya Di Donato15,17, Evelin Schröck15,17, André Heinen15,16, Ulrike Reuner15,18, Amalia-Mihaela Hanßke15, Frank Kaiser19, Eva Manka20, Martin Munteanu19, Alma Küchler19, Kiewert Cordula20, Raphael Hirtz20, Elena Schlapakow21, Christian Schlein22, Jasmin Lisfeld22, Christian Kubisch22,23, Theresia Herget22, Maja Hempel22,23, Christina Weiler-Normann23,24, Kurt Ullrich23, Christoph Schramm24,23, Cornelia Rudolph23, Franziska Rillig23, Maximilian Groffmann23, Ania Muntau25, Alexandra Tibelius26, Eva M. C. Schwaibold26, Christian P. Schaaf26, Michal Zawada26, Lilian Kaufmann26, Katrin Hinderhofer26, Pamela M. Okun27, Ourania Kotzaeridou27, Georg F. Hoffmann27, Daniela Choukair27, Markus Bettendorf27, Malte Spielmann28, Annekatrin Ripke28, Martje Pauly28, Alexander Münchau28, Katja Lohmann28, Irina Hüning28, Britta Hanka28, Tobias Bäumer28, Rebecca Herzog29, Yorck Hellenbroich29, Dominik S. Westphal4, Tim Strom4, Korbinian M. Riedhammer4, Katharina Mayerhanser4, Elisabeth Graf4, Melanie Brugger4, Konrad Oexle30, Nazanin Mirza-Schreiber30, Riccardo Berutti30, Christine Makowski Makowski31, Heike Weigand32, Sebastian Schröder32, Meino Rohlfs32, Vill Katharina32, Fabian Hauck32, Ingo Borggräfe32, Wolfgang Müller-Felber32, Stephan Ossowski3, Martin Kehrer3, German Demidov3, Stefanie Beck-Wödl3, Holm Gräßner33, Annette Grüters-Kieslich annette.grueters@charite.de34, Christoph Klein32, Stefan Mundlos2, Markus Nöthen1, Olaf Riess3, Thomas Meitinger4, Heiko Krude34, Peter Krawitz5,♦,◊, Tobias Haack3,♦, Nadja Ehmke2,♦, Matias Wagner4,♦

1Institute of Human Genetics, University Hospital Bonn, Bonn, Germany, 2Institute for Medical Genetics and Human Genetics, Charité University Medicine Berlin, Berlin, Germany, 3Institute for Medical Genetics and Applied Genomics, University of Tübingen, Tübingen, Germany, 4Institute of Human Genetics, Technical University München, München, Germany, 5Institute for Genomic Statistics and Bioinformatics, University Hospital Bonn, Bonn, Germany, 6Institut für Medizinische Biometrie, Informatik und Epidemiologie, University Hospital Bonn, Bonn, Germany, 7Institute for Medical Genetics, Stellenbosch University, Cape Town, South Africa, 8Department of Pediatrics, University Hospital Düsseldorf, Düsseldorf, Germany, 9Department of Pediatrics, Charité University Medicine Berlin, Berlin, Germany, 10Department of Human Genetics, Ruhr University Bochum, Bochum, Germany, 11Department of Pediatrics Bochum and CeSER, Ruhr University Bochum, Bochum, Germany, 12Center for Rare Diseases, University Hospital Bonn, Bonn, Germany, 13Department of Neurology, University Hospital Bonn, Bonn, Germany, 14Clinic fof Internal Medicine III, University Hospital Bonn, Bonn, Germany, 15University Center for Rare Diseases, University Hospital Carl Gustav Carus, Dresden, Germany, 16Department Pediatrics, University Hospital Carl Gustav Carus, Dresden, Germany, 17Institute for Clinical Genetics, University Hospital Carl Gustav Carus, Dresden, Germany, 18Department of Neurology, University Hospital Carl Gustav Carus, Dresden, Germany, 19Institute of Human Genetics, Universityhospital Essen, Essen, Germany, 20Department of Pediatrics II, Universityhospital Essen, Essen, Germany, 21Department of Neurology, University Hospital Halle, Halle, Germany, 22Institute of Human Genetics, University Hospital Hamburg-Eppendorf, Hamburg, Germany, 23Martin Zeitz Center for Rare Diseases, University Hospital Hamburg-Eppendorf, Hamburg, Germany, 24I. Department of Medicine, University Hospital Hamburg-Eppendorf, Hamburg, Germany, 25Department of Pediatrics, University Hospital Hamburg-Eppendorf, Hamburg, Germany, 26Institute of Human Genetics, Heidelberg University, Heidelberg, Germany, 27Center for Child and Adolescent Medicine, University Hospital Heidelberg, Heidelberg, Germany, 28Institute of Human Genetics, University of Lübeck, Lübeck, Germany, 29Department of Neurology, University of Lübeck, Lübeck, Germany, 30Institute of Neurogenomics, Helmholtz Zentrum München, München, Germany, 31Department of Paediatrics, Adolescent Medicine and Neonatology, München, Germany, 32Dr. von Hauner Children's Hospital, University Hospital Munich, München, Germany, 33Center for Rare Diseases, University of Tübingen, Tübingen, Germany, 34Berlin Centre for Rare Diseases, Charité University Medicine Berlin, Berlin, Germany

+equally contributing first authors, ♦equally contributing last authors, ◊corresponding author
